# Supplementary material
Source: PubMed Central journal article supplement (PMC6224706)
Supplement: mmc1.pdf [file mmc1.pdf]

## Circulating Biomarkers From the Phase 1 Trial of Sirolimus and Autophagy Inhibition for Patients With Lymphangiomyomatosis

*Anthony M. Lamattina, BS; Angelo Taveira-Dasilva, MD, PhD;  
Hilary J. Goldberg, MD; Shefali Bagwe, MBBS; Ye Cui, PhD;  
Ivan O. Rosas, MD; Joel Moss, MD, PhD; Elizabeth P. Henske, MD; and  
Souheil El-Chemaly, MD, MPH*

CHEST 2018; 154(5):1070-1082

*Online supplements are not copyedited prior to posting and the author(s) take full responsibility for the accuracy of all data.*

© 2018 AMERICAN COLLEGE OF CHEST PHYSICIANS. Reproduction of this article is prohibited without written permission from the American College of Chest Physicians. See online for more details. DOI: 10.1016/j.chest.2018.08.1029

## **e-Appendix 1.**

### **Material and Methods**

#### **Study population**

We recruited 14 women, one of whom was not included in this analysis due to failing to meet eligibility during the screening process (Supplemental Table 1). Subjects who were at least 18 years old, were eligible to enroll in the study if they had received a definite LAM diagnosis per the European Respiratory Society definition or were diagnosed with cystic lung disease featuring a VEGF-D level > 800 pg/mL. Women with FEV<sub>1</sub> or diffusion coefficient for carbon monoxide (DLCO) less than 80% or 70% predicted, respectively, were not eligible.

#### **Sample processing**

Serum was processed by allowing collected peripheral blood to clot for approximately 1 hour at room temperature, followed by centrifugation at 2,000 RPM for 15 minutes. Supernatants were then stored at -80°C for later analysis.

#### **Analytes measurements**

Serum was collected from every enrolled subject at each study visit. Analytes were measured using the DiscoveryMAP® platform which includes molecules associated with inflammation, vasculogenesis, matrix biology, metabolism, and cancer amongst other pathways. A full list of analytes is available at: <https://myriadrbm.com/products-services/humanmap-services/discoverymap/> (DiscoveryMAP; Myriad RBM, Austin, TX, USA).

#### **Sample Imputation**

One hundred eighty-three analytes were measurable in all samples. The remaining 96 proteins featured at least one sample that was either above or below the assay limit of quantification. Fifty-six analytes were outside the quantification limit in greater than 50% of samples and were excluded from the analysis. One analyte was not measurable in any of the samples and was therefore removed from the analysis. Imputations were performed with the 39 proteins that had 50% or less sample missingness, with sample values that were above or below the quantification limit being replaced with the upper or lower limit of quantification for that given analyte, respectively. Therefore, a total of 222 proteins were included in the analysis.

#### **Analyte association with baseline characteristics**

All analyte levels were log<sub>10</sub>-transformed prior to analyses to address any potential data skewness. To determine if any analytes were associated with baseline subject characteristics, we ran separate Student's T tests for baseline levels of each of the 222 proteins included in the analysis and compared subjects with or without supplemental oxygen use and post-menopausal status at baseline. Analytes significantly associated with each characteristic were identified as proteins that had a *P* value < 0.05.

### **Repeated-measures ANOVA**

To determine which proteins had significantly changed over the course of the study, repeated-measure analysis of variance (RM ANOVA) calculations using the Kenward-Roger approximation were implemented in separate linear mixed effects models with random intercepts for each of the 222 analytes (R package lmerTest v2.0.33). These analyses were performed over the entire study duration (baseline to week 48) and then over just the treatment period (baseline to week 24). For the analytes found to have significantly changed over the entire study period as well as for those changed over just the treatment period, RM ANOVA analyses were performed over the observation period, and those with non-significant outcomes were identified as analytes that remained stable after the treatment period, while those with significant outcomes were assessed as having returned to baseline analyte levels. A heat map displaying the log<sub>10</sub>-transformed levels at baseline, end of treatment, and end of study for the analytes changed over the treatment period was graphed using the R package gplots (version 3.0.1)<sup>1</sup>, while analytes and subjects were clustered using the built-in R function hclust and analyte levels were scaled per subject using the R package mousetrap (version 3.1.0)<sup>2,3</sup>. *P*-values were adjusted for multiple hypotheses with Benjamini-Hochberg false discovery rate (FDR) corrections<sup>4</sup>, and significantly changed analytes were identified as those for which the *q* value was < 0.05.

### **Analyte association with lung function**

To assess if the changes in any analytes were associated with changes in lung function, we first investigated the predictive capabilities of changes in analyte level. Using only the analytes that had significantly changed during the treatment period by RM ANOVA, separate longitudinal linear mixed effects models with random intercepts were run for each protein (R package lmerTest v2.0.33). These models included FEV<sub>1</sub> percentage of predicted post-bronchodilator measurements recorded over the course of the study as the outcome, the respective analyte level as the covariate, and a time variable (weeks) as a means of controlling for the time-varying aspect of the analyte. The analyses were run over the entire study duration (baseline to week 48) and then just over the treatment period (baseline to week 24). After Benjamini-Hochberg FDR correction, analytes that were significantly associated with changes in lung function were identified as those for which the *q* value of the analyte covariate was < 0.05.

We also assessed if analyte changes from visit 1 (baseline) to visit 2 (week 3) could predict changes in lung function. First, of the 222 analytes in the analysis, we identified those that had significantly changed from visit 1 to visit 2 by paired T test after Benjamini-Hochberg FDR correction (*q* < 0.05). Using these analytes, we ran separate longitudinal linear mixed effects models with random intercepts. The models again included the FEV<sub>1</sub>

percentage of predicted post-bronchodilator measurements recorded throughout the study as the outcome, main effects for the log difference between visit 2 and visit 1 concentrations for the respective analyte and a time variable (weeks), and the interaction between the log difference and the time variable. Again, two separate sets of analyses were run: one investigating the entire study duration and another examining only the treatment period. Significant predictors of lung function by visit 2 were identified as analytes that featured a significant log difference-time interaction term after Benjamini-Hochberg FDR correction ( $q < 0.05$ ).

### **Identifying hydroxychloroquine-dependent analytes**

To differentiate analytes that were primarily regulated by rapamycin alone from those that may have been impacted by the combination of rapamycin and hydroxychloroquine treatments, we ran separate longitudinal linear mixed effects models with random intercepts to compare the changes in each of the 222 analytes over the treatment period between the subjects treated with low dose hydroxychloroquine (LD) and those treated with high dose hydroxychloroquine (HD). These models contained the respective analytes as the outcome, the main effects of hydroxychloroquine group assignment (HD = 1, LD = 0) and time in weeks, and the interaction between hydroxychloroquine group and time. Analytes with rates of change significantly different between LD and HD groups were identified as those for which the group-time interaction was significant ( $P < 0.05$ ). Furthermore, paired Student's T tests were implemented comparing levels of these identified analytes at each visit to baseline levels for all subjects and separately for LD and HD subjects to determine which analytes had significantly changed from the start of the study ( $P < 0.05$ ). In addition, to more directly assess the effects of hydroxychloroquine on these analytes, Student's T tests were performed comparing LD and HD levels at each study visit, with significant results indicating hydroxychloroquine-dependent regulation of a given analyte ( $P < 0.05$ ).

### **Determining indicators of autophagy inhibition**

To assess the effect of hydroxychloroquine on autophagy, we cross-referenced all measurable analytes with a human autophagy gene database<sup>5</sup> and identified common analytes. As with the identified hydroxychloroquine-dependent analytes, for each autophagy-associated analyte we implemented paired Student's T tests to assess differences from baseline at each study visit for all subjects and for LD and HD subjects separately and used Student's T tests to directly compare analyte levels between LD and HD subjects at each study visit.

### **Ontology and Network Analysis**

To determine ontology enrichments of analyte lists of interest, the respective analytes were submitted to the Database for Annotation, Visualization, and Integrated Discovery (DAVID) (Version 6.8)<sup>6,7</sup> and any gene ontology (GO) terms pertaining to the category biological process 1 (GOTERM\_BP\_1) that were significantly enriched by Benjamini-Hochberg FDR were identified ( $q < 0.05$ ). These lists of proteins were also submitted to STRING (version 10.5,<sup>8</sup>) to determine significant Kyoto Encyclopedia of Genes and Genomes (KEGG) pathway enrichments ( $q < 0.05$ ). Within Search Tool for the Retrieval of Interacting Genes/Proteins (STRING), 1<sup>st</sup> and 2<sup>nd</sup> shell interactors were added to the query analytes (Experimental only active interaction source; minimum required interaction score = 0.700) to build protein-protein interaction networks.

e-Figure 1:

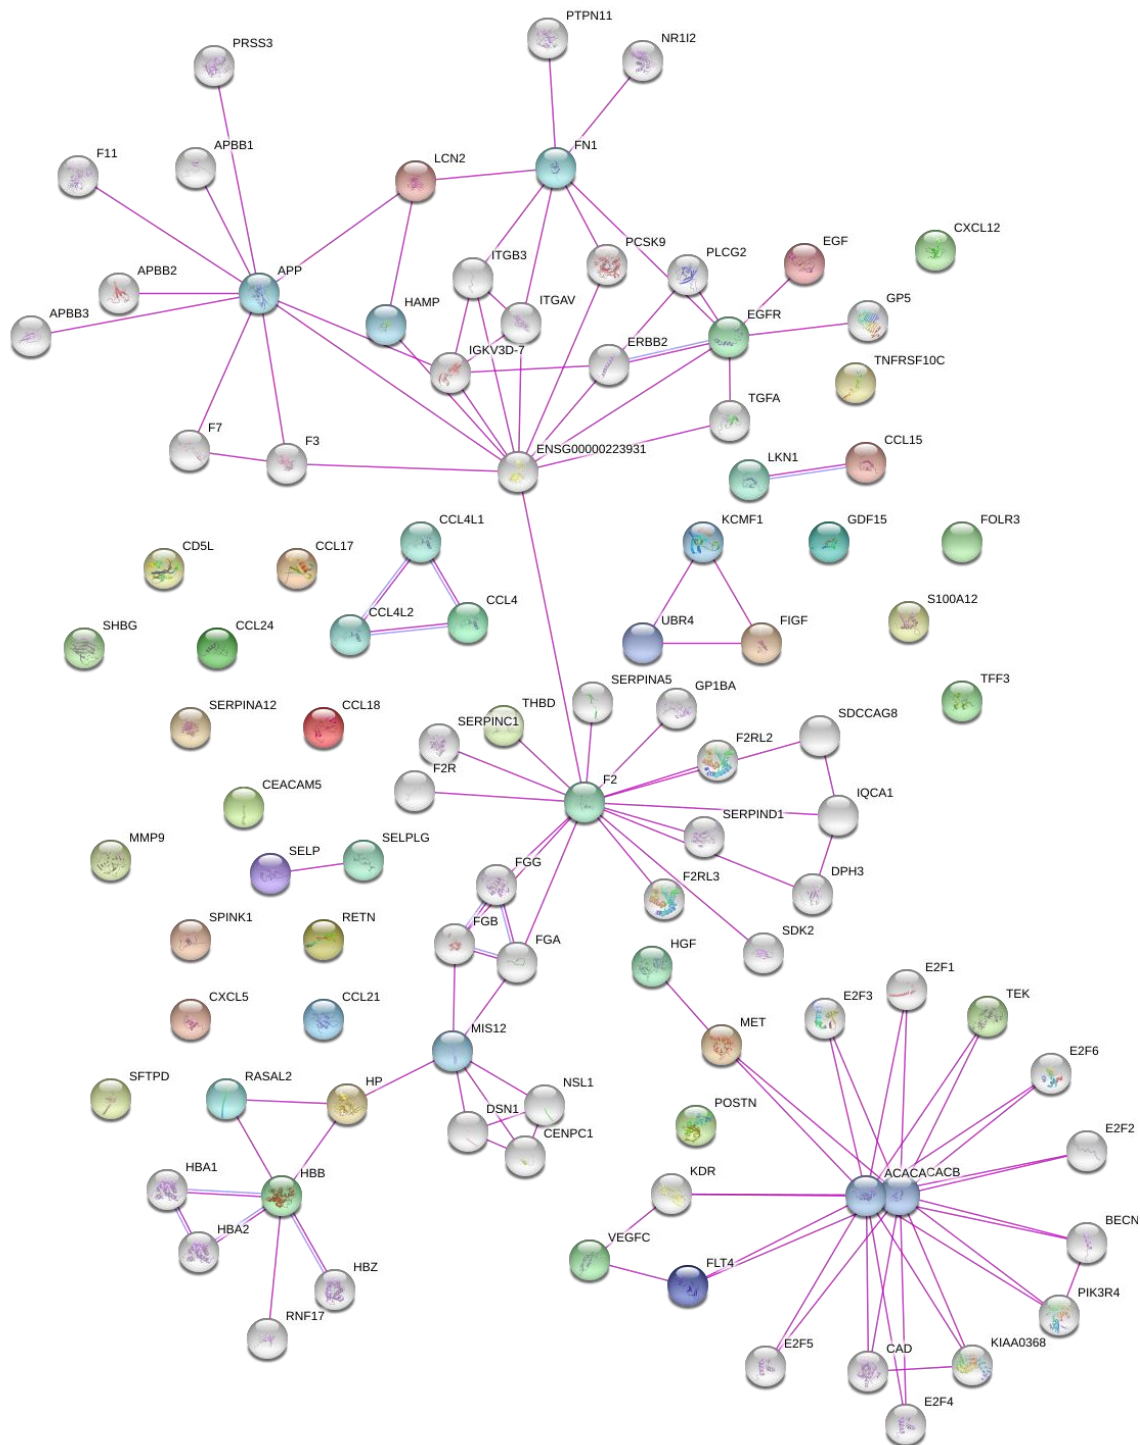

STRING analysis of 32 analytes differentially changed over time and multiple visits between baseline and end of treatment.

**e-Table 1: study subjects baseline characteristics (Additional details in reference 5)**

|                                           |            |
|-------------------------------------------|------------|
| Subjects enrolled and received study drug | 13         |
| Age                                       | 49 (40-65) |
| FEV1 (% predicted)                        | 59 ± 21    |
| FVC (% predicted)                         | 81 ± 16    |
| DLCO (% predicted)                        | 43 ± 15    |

**e-Table 2: Description of data**

| <b>100% Within Limit of Quantification</b>                                 |                                                   |                                                                    |
|----------------------------------------------------------------------------|---------------------------------------------------|--------------------------------------------------------------------|
| <b>Analyte</b>                                                             | <b>Percent of Samples Outside Detection Limit</b> | <b>Percent of Subjects with Samples Outside Limit of Detection</b> |
| A.disintegrin.and.metalloproteinase.with.thrombospondin.motifs.8..ADAMTS8. | 0                                                 | 0                                                                  |
| Adiponectin                                                                | 0                                                 | 0                                                                  |
| Adrenomedullin..ADM.                                                       | 0                                                 | 0                                                                  |
| Aggrecan.core.protein..Aggrecan.                                           | 0                                                 | 0                                                                  |
| Alpha.1.acid.glycoprotein.1..AGP.1.                                        | 0                                                 | 0                                                                  |
| Alpha.1.Antitrypsin..AAT.                                                  | 0                                                 | 0                                                                  |
| Alpha.1.Microglobulin..A1Micro.                                            | 0                                                 | 0                                                                  |
| Alpha.2.Macroglobulin..A2Macro.                                            | 0                                                 | 0                                                                  |
| Angiogenin                                                                 | 0                                                 | 0                                                                  |
| Angiopoietin.1..ANG.1.                                                     | 0                                                 | 0                                                                  |
| Angiopoietin.2..ANG.2.                                                     | 0                                                 | 0                                                                  |
| Angiopoietin.related.protein.4..ANGPTL4.                                   | 0                                                 | 0                                                                  |
| Angiotensin.Converting.Enzyme..ACE.                                        | 0                                                 | 0                                                                  |
| Antileukoproteinase..ALP.                                                  | 0                                                 | 0                                                                  |
| Antithrombin.III..AT.III.                                                  | 0                                                 | 0                                                                  |
| Apolipoprotein.a...Lp.a..                                                  | 0                                                 | 0                                                                  |
| Apolipoprotein.A.I..Apo.A.I.                                               | 0                                                 | 0                                                                  |
| Apolipoprotein.A.II..Apo.A.II.                                             | 0                                                 | 0                                                                  |
| Apolipoprotein.B..Apo.B.                                                   | 0                                                 | 0                                                                  |
| Apolipoprotein.C.I..Apo.C.I.                                               | 0                                                 | 0                                                                  |
| Apolipoprotein.C.III..Apo.C.III.                                           | 0                                                 | 0                                                                  |
| Apolipoprotein.D..Apo.D.                                                   | 0                                                 | 0                                                                  |
| Apolipoprotein.E..Apo.E.                                                   | 0                                                 | 0                                                                  |
| Apolipoprotein.H..Apo.H.                                                   | 0                                                 | 0                                                                  |
| AXL.Receptor.Tyrosine.Kinase..AXL.                                         | 0                                                 | 0                                                                  |
| B.cell.activating.factor..BAFF.                                            | 0                                                 | 0                                                                  |



|                                                                     |   |   |
|---------------------------------------------------------------------|---|---|
| Beta.2.Microglobulin..B2M.                                          | 0 | 0 |
| Beta.Amyloid.1.40..AB.40.                                           | 0 | 0 |
| Brain.Derived.Neurotrophic.Factor..BDNF.                            | 0 | 0 |
| C.C.motif.chemokine.15..CCL15.                                      | 0 | 0 |
| C.Peptide                                                           | 0 | 0 |
| C.Reactive.Protein..CRP.                                            | 0 | 0 |
| Cadherin.1..E.Cad.                                                  | 0 | 0 |
| Cancer.Antigen.15.3..CA.15.3.                                       | 0 | 0 |
| Carcinoembryonic.Antigen..CEA.                                      | 0 | 0 |
| Carcinoembryonic.antigen.related.cell.adhesion.molecule.1..CEACAM1. | 0 | 0 |
| Cathepsin.D                                                         | 0 | 0 |
| CD163                                                               | 0 | 0 |
| CD27.antigen..CD27.                                                 | 0 | 0 |
| CD40.Ligand..CD40.L.                                                | 0 | 0 |
| CD5.Antigen.like..CD5L.                                             | 0 | 0 |
| Chemokine.CC.4..HCC.4.                                              | 0 | 0 |
| Chromogranin.A..CgA.                                                | 0 | 0 |
| Clusterin..CLU.                                                     | 0 | 0 |
| Complement.C3..C3.                                                  | 0 | 0 |
| Complement.Factor.H...Related.Protein.1..CFHR1.                     | 0 | 0 |
| Complement.Factor.H..CFH.                                           | 0 | 0 |
| Cystatin.B                                                          | 0 | 0 |
| Cystatin.C                                                          | 0 | 0 |
| Decorin                                                             | 0 | 0 |
| Dickkopf.related.protein.1..DKK.1.                                  | 0 | 0 |
| E.Selectin                                                          | 0 | 0 |
| Endoglin                                                            | 0 | 0 |
| Endostatin                                                          | 0 | 0 |
| Eotaxin.2                                                           | 0 | 0 |
| Epidermal.Growth.Factor..EGF.                                       | 0 | 0 |
| Epidermal.Growth.Factor.Receptor..EGFR.                             | 0 | 0 |
| Epithelial.Derived.Neutrophil.Activating.Protein.78..ENA.78.        | 0 | 0 |
| Factor.VII                                                          | 0 | 0 |
| Fatty.Acid.Binding.Protein..adipocyte..FABP..adipocyte.             | 0 | 0 |
| Ferritin..FRTN.                                                     | 0 | 0 |

|                                                                              |   |   |
|------------------------------------------------------------------------------|---|---|
| Fetuin.A                                                                     | 0 | 0 |
| Ficolin.3                                                                    | 0 | 0 |
| Follicle.Stimulating.Hormone..FSH.                                           | 0 | 0 |
| Galectin.3                                                                   | 0 | 0 |
| Gelsolin                                                                     | 0 | 0 |
| Glucose.6.phosphate.Isomerase..G6PI.                                         | 0 | 0 |
| Growth.differentiation.factor.15..GDF.15.                                    | 0 | 0 |
| Growth.Regulated.alpha.protein..GRO.alpha.                                   | 0 | 0 |
| Haptoglobin                                                                  | 0 | 0 |
| HE4                                                                          | 0 | 0 |
| Heat.Shock.protein.70..HSP.70.                                               | 0 | 0 |
| Hemopexin                                                                    | 0 | 0 |
| Heparin.Binding.EGF.Like.Growth.Factor..HB.EGF.                              | 0 | 0 |
| Hepatocyte.Growth.Factor..HGF.                                               | 0 | 0 |
| Hepatocyte.Growth.Factor.receptor..HGF.receptor.                             | 0 | 0 |
| Hepsin                                                                       | 0 | 0 |
| Human.Epidermal.Growth.Factor.Receptor.2..HER.2.                             | 0 | 0 |
| Immunoglobulin.A..IgA.                                                       | 0 | 0 |
| Insulin.like.Growth.Factor.Binding.Protein.2..IGFBP.2.                       | 0 | 0 |
| Insulin.like.Growth.Factor.Binding.Protein.7..IGFBP.7.                       | 0 | 0 |
| Intercellular.Adhesion.Molecule.1..ICAM.1.                                   | 0 | 0 |
| Interferon.gamma.Induced.Protein.10..IP.10.                                  | 0 | 0 |
| Interleukin.1.receptor.antagonist..IL.1ra.                                   | 0 | 0 |
| Interleukin.1.receptor.type.1..IL.1RI.                                       | 0 | 0 |
| Interleukin.1.receptor.type.2..IL.1RII.                                      | 0 | 0 |
| Interleukin.16..IL.16.                                                       | 0 | 0 |
| Interleukin.18..IL.18.                                                       | 0 | 0 |
| Interleukin.2.receptor.alpha..IL.2.receptor.alpha.                           | 0 | 0 |
| Interleukin.6.receptor..IL.6r.                                               | 0 | 0 |
| Interleukin.6.receptor.subunit.beta..IL.6R.beta.                             | 0 | 0 |
| Kallikrein.5                                                                 | 0 | 0 |
| Kallikrein.7..KLK.7.                                                         | 0 | 0 |
| Lactoferrin..LTF.                                                            | 0 | 0 |
| Latency.Associated.Peptide.of.Transforming.Growth.Factor.beta.1..LAP.TGF.b1. | 0 | 0 |
| Leptin                                                                       | 0 | 0 |

|                                                                |   |   |
|----------------------------------------------------------------|---|---|
| Leptin.Receptor..Leptin.R.                                     | 0 | 0 |
| Leucine.rich.alpha.2.glycoprotein..LRG1.                       | 0 | 0 |
| Luteinizing.Hormone..LH.                                       | 0 | 0 |
| Macrophage.Derived.Chemokine..MDC.                             | 0 | 0 |
| Macrophage.inflammatory.protein.3.beta..MIP.3.beta.            | 0 | 0 |
| Macrophage.Stimulating.Protein..MSP.                           | 0 | 0 |
| Mast.stem.cell.growth.factor.receptor..SCFR.                   | 0 | 0 |
| Matrix.Metalloproteinase.1..MMP.1.                             | 0 | 0 |
| Matrix.Metalloproteinase.2..MMP.2.                             | 0 | 0 |
| Matrix.Metalloproteinase.3..MMP.3.                             | 0 | 0 |
| Matrix.Metalloproteinase.7..MMP.7.                             | 0 | 0 |
| Matrix.Metalloproteinase.9..total..MMP.9..total.               | 0 | 0 |
| Monocyte.Chemotactic.Protein.2..MCP.2.                         | 0 | 0 |
| Monocyte.Chemotactic.Protein.4..MCP.4.                         | 0 | 0 |
| Myeloid.Progenitor.Inhibitory.Factor.1..MPIF.1.                | 0 | 0 |
| Myeloperoxidase..MPO.                                          | 0 | 0 |
| Myoglobin                                                      | 0 | 0 |
| N.terminal.prohormone.of.brain.natriuretic.peptide..NT.proBNP. | 0 | 0 |
| Neuropilin.1                                                   | 0 | 0 |
| Neutrophil.Activating.Peptide.2..NAP.2.                        | 0 | 0 |
| Neutrophil.Gelatinase.Associated.Lipocalin..NGAL.              | 0 | 0 |
| Omentin                                                        | 0 | 0 |
| Osteoprotegerin..OPG.                                          | 0 | 0 |
| P.Selectin                                                     | 0 | 0 |
| Pancreatic.Polypeptide..PPP.                                   | 0 | 0 |
| Pancreatic.secretory.trypsin.inhibitor..TATI.                  | 0 | 0 |
| Paraoxonase.1..PON.1.                                          | 0 | 0 |
| Pepsinogen.I..PGI.                                             | 0 | 0 |
| Periostin                                                      | 0 | 0 |
| Pigment.Epithelium.Derived.Factor..PEDF.                       | 0 | 0 |
| Plasminogen.Activator.Inhibitor.1..PAI.1.                      | 0 | 0 |
| Platelet.Derived.Growth.Factor.BB..PDGF.BB.                    | 0 | 0 |
| Platelet.endothelial.cell.adhesion.molecule..PECAM.1.          | 0 | 0 |
| Prolactin..PRL.                                                | 0 | 0 |
| Prostasin                                                      | 0 | 0 |

|                                                             |   |   |
|-------------------------------------------------------------|---|---|
| Protein.S100.A6..S100.A6.                                   | 0 | 0 |
| Pulmonary.and.Activation.Regulated.Chemokine..PARC.         | 0 | 0 |
| Pulmonary.surfactant.associated.protein.D..SP.D.            | 0 | 0 |
| Receptor.for.advanced.glycosylation.end.products..RAGE.     | 0 | 0 |
| Receptor.tyrosine.protein.kinase.erbB.3..ErbB3.             | 0 | 0 |
| Resistin                                                    | 0 | 0 |
| Retinol.binding.protein.4..RBP.4.                           | 0 | 0 |
| Sclerostin                                                  | 0 | 0 |
| Serum.Amyloid.A.Protein..SAA.                               | 0 | 0 |
| Serum.Amyloid.P.Component..SAP.                             | 0 | 0 |
| Sex.Hormone.Binding.Globulin..SHBG.                         | 0 | 0 |
| ST2                                                         | 0 | 0 |
| Stromal.cell.derived.factor.1..SDF.1.                       | 0 | 0 |
| Superoxide.Dismutase.1..soluble..SOD.1.                     | 0 | 0 |
| T.Cell.Specific.Protein.RANTES..RANTES.                     | 0 | 0 |
| Tamm.Horsfall.Urinary.Glycoprotein..THP.                    | 0 | 0 |
| Tenascin.C..TN.C.                                           | 0 | 0 |
| Tetranectin                                                 | 0 | 0 |
| Thrombin.Activable.Fibrinolysis..TAFI.                      | 0 | 0 |
| Thrombomodulin..TM.                                         | 0 | 0 |
| Thrombospondin.1                                            | 0 | 0 |
| Thymus.and.activation.regulated.chemokine..TARC.            | 0 | 0 |
| Thyroid.Stimulating.Hormone..TSH.                           | 0 | 0 |
| Thyroxine.Binding.Globulin..TBG.                            | 0 | 0 |
| Tissue.Inhibitor.of.Metalloproteinases.1..TIMP.1.           | 0 | 0 |
| Tissue.Inhibitor.of.Metalloproteinases.2..TIMP.2.           | 0 | 0 |
| Tissue.Inhibitor.of.Metalloproteinases.3..TIMP.3.           | 0 | 0 |
| Tissue.type.Plasminogen.activator..tPA.                     | 0 | 0 |
| TNF.Related.Apoptosis.Inducing.Ligand.Receptor.3..TRAIL.R3. | 0 | 0 |
| Transferrin.receptor.protein.1..TFR1.                       | 0 | 0 |
| Transthyretin..TTR.                                         | 0 | 0 |
| Trefoil.Factor.3..TFF3.                                     | 0 | 0 |
| Tumor.necrosis.factor.ligand.superfamily.member.12..Tweak.  | 0 | 0 |
| Tumor.necrosis.factor.ligand.superfamily.member.13..APRIL.  | 0 | 0 |
| Tumor.necrosis.factor.receptor.2..TNFR2.                    | 0 | 0 |

|                                                            |                                                 |                                                                      |
|------------------------------------------------------------|-------------------------------------------------|----------------------------------------------------------------------|
| Tumor.Necrosis.Factor.Receptor.I..TNF.RI.                  | 0                                               | 0                                                                    |
| Tyrosine.kinase.with.Ig.and.EGF.homology.domains.2..TIE.2. | 0                                               | 0                                                                    |
| Urokinase.type.plasminogen.activator.receptor..uPAR.       | 0                                               | 0                                                                    |
| Uteroglobin                                                | 0                                               | 0                                                                    |
| Vascular.Cell.Adhesion.Molecule.1..VCAM.1.                 | 0                                               | 0                                                                    |
| Vascular.Endothelial.Growth.Factor..VEGF.                  | 0                                               | 0                                                                    |
| Vascular.endothelial.growth.factor.D..VEGF.D.              | 0                                               | 0                                                                    |
| Vascular.Endothelial.Growth.Factor.Receptor.2..VEGFR.2.    | 0                                               | 0                                                                    |
| Vascular.endothelial.growth.factor.receptor.3..VEGFR.3.    | 0                                               | 0                                                                    |
| Visceral.adipose.tissue...derived.serpine.A12..Vaspin.     | 0                                               | 0                                                                    |
| Visfatin                                                   | 0                                               | 0                                                                    |
| Vitamin.D.Binding.Protein..VDBP.                           | 0                                               | 0                                                                    |
| Vitamin.K.Dependent.Protein.S..VKDPS.                      | 0                                               | 0                                                                    |
| Vitronectin                                                | 0                                               | 0                                                                    |
| von.Willebrand.Factor..vWF.                                | 0                                               | 0                                                                    |
| X6Ckine                                                    | 0                                               | 0                                                                    |
| YKL.40                                                     | 0                                               | 0                                                                    |
| <b>Above Limit of Quantification</b>                       |                                                 |                                                                      |
| <b>Analyte</b>                                             | <b>Percent of Samples Above Detection Limit</b> | <b>Percent of Subjects with Samples Above the Limit of Detection</b> |
| Folate.receptor.gamma..FOLR3.                              | 11.54                                           | 15.38                                                                |
| Interleukin.18.binding.protein..IL.18bp.                   | 3.85                                            | 7.69                                                                 |
| EN.RAGE                                                    | 1.28                                            | 7.69                                                                 |
| Fibulin.1C..Fib.1C.                                        | 1.28                                            | 7.69                                                                 |
| <b>Below Limit of Quantification</b>                       |                                                 |                                                                      |
| <b>Analyte</b>                                             | <b>Percent of Samples Below</b>                 | <b>Percent of Subjects with Samples Below the</b>                    |

|                                                           | <b>Detection Limit</b> | <b>Limit of Detection</b> |
|-----------------------------------------------------------|------------------------|---------------------------|
| Ciliary.Neurotrophic.Factor..CNTF.                        | 100                    | 100                       |
| Eotaxin.3                                                 | 100                    | 100                       |
| Granulocyte.Macrophage.Colony.Stimulating.Factor..GM.CSF. | 100                    | 100                       |
| Interferon.alpha..IFN.alpha.                              | 100                    | 100                       |
| Interferon.gamma..IFN.gamma.                              | 100                    | 100                       |
| Interleukin.12.Subunit.p70..IL.12p70.                     | 100                    | 100                       |
| Interleukin.13..IL.13.                                    | 100                    | 100                       |
| Interleukin.17..IL.17.                                    | 100                    | 100                       |
| Interleukin.2..IL.2.                                      | 100                    | 100                       |
| Interleukin.3..IL.3.                                      | 100                    | 100                       |
| Interleukin.4..IL.4.                                      | 100                    | 100                       |
| Interleukin.5..IL.5.                                      | 100                    | 100                       |
| Interleukin.6..IL.6.                                      | 100                    | 100                       |
| Interleukin.7..IL.7.                                      | 100                    | 100                       |
| Maspin                                                    | 100                    | 100                       |
| Monocyte.Chemotactic.Protein.3..MCP.3.                    | 100                    | 100                       |
| Nerve.Growth.Factor.beta..NGF.beta.                       | 100                    | 100                       |
| Prostate.Specific.Antigen..Free..PSA.f.                   | 100                    | 100                       |
| Transforming.Growth.Factor.beta.3..TGF.beta.3.            | 100                    | 100                       |
| Tumor.Necrosis.Factor.beta..TNF.beta.                     | 100                    | 100                       |
| Vascular.Endothelial.Growth.Factor.Receptor.1..VEGFR.1.   | 100                    | 100                       |
| Betacellulin..BTC.                                        | 98.72                  | 100                       |
| Interleukin.10..IL.10.                                    | 98.72                  | 100                       |
| Neuronal.Cell.Adhesion.Molecule..Nr.CAM.                  | 98.72                  | 100                       |
| S100.calcium.binding.protein.B..S100.B.                   | 98.72                  | 100                       |
| Tumor.Necrosis.Factor.alpha..TNF.alpha.                   | 98.72                  | 100                       |
| Alpha.Fetoprotein..AFP.                                   | 97.44                  | 100                       |
| Amphiregulin..AR.                                         | 97.44                  | 100                       |
| Neurofilament.heavy.polypeptide..NF.H.                    | 97.44                  | 100                       |
| Macrophage.Inflammatory.Protein.1.alpha..MIP.1.alpha.     | 94.87                  | 92.31                     |
| Epiregulin..EPR.                                          | 93.59                  | 100                       |
| Fatty.Acid.Binding.Protein..heart..FABP..heart.           | 93.59                  | 100                       |
| Fibrinogen                                                | 93.59                  | 100                       |

|                                                          |       |       |
|----------------------------------------------------------|-------|-------|
| Interleukin.31..IL.31.                                   | 93.59 | 100   |
| Fatty.Acid.Binding.Protein..liver..FABP..liver.          | 92.31 | 100   |
| Granulocyte.Colony.Stimulating.Factor..G.CSF.            | 92.31 | 100   |
| Glycogen.phosphorylase.isoenzyme.BB..GPBB.               | 89.74 | 92.31 |
| MHC.class.I.chain.related.protein.A..MICA.               | 87.18 | 100   |
| Beta.Amyloid.1.42..AB.42.                                | 80.77 | 92.31 |
| Fibroblast.growth.factor.23..FGF.23.                     | 78.21 | 100   |
| Interleukin.1.beta..IL.1.beta.                           | 76.92 | 100   |
| Calbindin                                                | 75.64 | 100   |
| Cellular.Fibronectin..cFib.                              | 75.64 | 84.62 |
| Glucagon.like.Peptide.1..total..GLP.1.total.             | 75.64 | 84.62 |
| Interleukin.15..IL.15.                                   | 73.08 | 100   |
| Placenta.Growth.Factor..PLGF.                            | 73.08 | 92.31 |
| Macrophage.Inflammatory.Protein.3.alpha..MIP.3.alpha.    | 70.51 | 100   |
| Kidney.Injury.Molecule.1..KIM.1.                         | 69.23 | 84.62 |
| Human.Chorionic.Gonadotropin.beta..hCG.                  | 67.95 | 69.23 |
| Fas.Ligand..FasL.                                        | 65.38 | 100   |
| T.Lymphocyte.Secreted.Protein.I.309..I.309.              | 65.38 | 92.31 |
| Thyroglobulin..TG.                                       | 62.82 | 76.92 |
| Interleukin.1.alpha..IL.1.alpha.                         | 60.26 | 92.31 |
| Cancer.Antigen.125..CA.125.                              | 60.26 | 69.23 |
| Interleukin.8..IL.8.                                     | 56.41 | 92.31 |
| Matrix.Metalloproteinase.9..MMP.9.                       | 52.56 | 100   |
| B.Lymphocyte.Chemoattractant..BLC.                       | 50    | 92.31 |
| Insulin                                                  | 48.72 | 76.92 |
| Interleukin.22..IL.22.                                   | 43.59 | 92.31 |
| Gastric.inhibitory.polypeptide..GIP.                     | 42.31 | 76.92 |
| Osteopontin                                              | 34.62 | 69.23 |
| Growth.Hormone..GH.                                      | 28.21 | 69.23 |
| Dopamine.beta.hydroxylase..DBH.                          | 21.79 | 38.46 |
| Fibroblast.Growth.Factor.21..FGF.21.                     | 20.51 | 38.46 |
| Macrophage.Inflammatory.Protein.1.beta..MIP.1.beta.      | 17.95 | 46.15 |
| Cancer.Antigen.19.9..CA.19.9.                            | 16.67 | 23.08 |
| Macrophage.Colony.Stimulating.Factor.1..M.CSF.           | 15.38 | 30.77 |
| Interferon.inducible.T.cell.alpha.chemoattractant..ITAC. | 12.82 | 46.15 |

|                                                        |                                        |                                                      |
|--------------------------------------------------------|----------------------------------------|------------------------------------------------------|
| Carbonic.anhydrase.9..CA.9.                            | 11.54                                  | 30.77                                                |
| Epithelial.cell.adhesion.molecule..EpCam.              | 11.54                                  | 30.77                                                |
| Protein.DJ.1..DJ.1.                                    | 10.26                                  | 15.38                                                |
| Erythropoietin..EPO.                                   | 8.97                                   | 23.08                                                |
| Macrophage.Migration.Inhibitory.Factor..MIF.           | 8.97                                   | 23.08                                                |
| Interleukin.12.Subunit.p40..IL.12p40.                  | 7.69                                   | 38.46                                                |
| Lectin.Like.Oxidized.LDL.Receptor.1..LOX.1.            | 7.69                                   | 30.77                                                |
| Eotaxin.1                                              | 7.69                                   | 15.38                                                |
| Immunoglobulin.M..IgM.                                 | 7.69                                   | 7.69                                                 |
| Thymus.Expressed.Chemokine..TECK.                      | 6.41                                   | 23.08                                                |
| Stem.Cell.Factor..SCF.                                 | 5.13                                   | 15.38                                                |
| Monokine.Induced.by.Gamma.Interferon..MIG.             | 3.85                                   | 15.38                                                |
| Neuron.Specific.Enolase..NSE.                          | 2.56                                   | 15.38                                                |
| Interleukin.23..IL.23.                                 | 2.56                                   | 7.69                                                 |
| Sortilin                                               | 2.56                                   | 7.69                                                 |
| Urokinase.type.Plasminogen.Activator..uPA.             | 2.56                                   | 7.69                                                 |
| Bone.morphogenetic.protein.9..BMP.9.                   | 1.28                                   | 7.69                                                 |
| Collagen.IV                                            | 1.28                                   | 7.69                                                 |
| FASLG.Receptor..FAS.                                   | 1.28                                   | 7.69                                                 |
| Insulin.like.Growth.Factor.Binding.Protein.1..IGFBP.1. | 1.28                                   | 7.69                                                 |
| Matrix.Metalloproteinase.10..MMP.10.                   | 1.28                                   | 7.69                                                 |
| Monocyte.Chemotactic.Protein.1..MCP.1.                 | 1.28                                   | 7.69                                                 |
| Progranulin                                            | 1.28                                   | 7.69                                                 |
| <b>Non-readable</b>                                    |                                        |                                                      |
| <b>Analyte</b>                                         | <b>Percent of Non-readable Samples</b> | <b>Percent of Subjects with Non-readable Samples</b> |
| Immunoglobulin.E..IgE.                                 | 100                                    | 100                                                  |



**e-Table 3: GO terms associated with baseline supplemental oxygen use.**

| GO Term                          |            |            | KEGG    |     |
|----------------------------------|------------|------------|---------|-----|
| GO Term                          | P          | Benjamini  | Pathway | FDR |
| immune system process            | 1.37E-04   | 0.00274183 | None    |     |
| developmental process            | 2.25E-04   | 0.00224899 |         |     |
| multi-organism process           | 8.04E-04   | 0.00534707 |         |     |
| reproductive process             | 0.00267318 | 0.01329464 |         |     |
| reproduction                     | 0.00269048 | 0.01071857 |         |     |
| regulation of biological process | 0.00371973 | 0.01234539 |         |     |
| signaling                        | 0.00429985 | 0.01223628 |         |     |
| biological adhesion              | 0.00687198 | 0.01709151 |         |     |
| biological regulation            | 0.00767962 | 0.01698578 |         |     |
| response to stimulus             | 0.01039723 | 0.02068635 |         |     |
| multicellular organismal process | 0.0112848  | 0.02042304 |         |     |
| locomotion                       | 0.02512563 | 0.04152434 |         |     |
| growth                           | 0.03208992 | 0.04894045 |         |     |
| metabolic process                | 0.03440318 | 0.04878267 |         |     |

**e-Table 4: GO terms and KEGG pathways associated with baseline menopausal status.**

| GO Term                          |            |            | KEGG                                   |          |
|----------------------------------|------------|------------|----------------------------------------|----------|
| GO Term                          | P          | Benjamini  | Pathway                                | FDR      |
| immune system process            | 4.59E-07   | 9.63E-06   | Cytokine-cytokine receptor interaction | 2.39E-09 |
| multi-organism process           | 2.11E-06   | 2.22E-05   | Rheumatoid arthritis                   | 0.000397 |
| signaling                        | 1.10E-05   | 7.71E-05   | Hematopoietic cell lineage             | 0.0126   |
| response to stimulus             | 2.80E-05   | 1.47E-04   | PI3K-Akt signaling pathway             | 0.042    |
| reproductive process             | 4.52E-05   | 1.90E-04   |                                        |          |
| reproduction                     | 4.58E-05   | 1.60E-04   |                                        |          |
| regulation of biological process | 5.01E-05   | 1.50E-04   |                                        |          |
| locomotion                       | 1.06E-04   | 2.78E-04   |                                        |          |
| biological regulation            | 1.81E-04   | 4.22E-04   |                                        |          |
| developmental process            | 4.45E-04   | 9.35E-04   |                                        |          |
| localization                     | 0.00298831 | 0.00569721 |                                        |          |
| single-organism process          | 0.00533609 | 0.00931946 |                                        |          |
| biological adhesion              | 0.00623931 | 0.01005952 |                                        |          |
| multicellular organismal process | 0.00671213 | 0.01005128 |                                        |          |

**e-Table 5:** Analytes significantly changed over entire study period.

| Analyte                                                     | p value  | q value     |
|-------------------------------------------------------------|----------|-------------|
| Pulmonary.and.Activation.Regulated.Chemokine..PARC.         | 1.32E-13 | 2.92E-11    |
| TNF.Related.Apoptosis.Inducing.Ligand.Receptor.3..TRAIL.R3. | 1.21E-09 | 1.34E-07    |
| Pulmonary.surfactant.associated.protein.D..SP.D.            | 3.17E-09 | 2.35E-07    |
| Tyrosine.kinase.with.Ig.and.EGF.homology.domains.2..TIE.2.  | 5.07E-09 | 2.39E-07    |
| Vascular.endothelial.growth.factor.D..VEGF.D.               | 5.39E-09 | 2.39E-07    |
| Alpha.1.acid.glycoprotein.1..AGP.1.                         | 1.33E-07 | 4.91E-06    |
| Macrophage.Inflammatory.Protein.1.beta..MIP.1.beta.         | 5.44E-07 | 1.73E-05    |
| Haptoglobin                                                 | 1.23E-06 | 3.41E-05    |
| Periostin                                                   | 3.44E-06 | 8.49E-05    |
| Resistin                                                    | 4.05E-06 | 8.98E-05    |
| Eotaxin.2                                                   | 4.57E-06 | 9.23E-05    |
| Matrix.Metalloproteinase.9..total..MMP.9..total.            | 5.99E-06 | 0.000110802 |
| Trefoil.Factor.3..TFF3.                                     | 2.98E-05 | 0.000509089 |
| Thrombomodulin..TM.                                         | 3.71E-05 | 0.000587842 |
| P.Selectin                                                  | 4.23E-05 | 0.000625318 |
| Serum.Amyloid.P.Component..SAP.                             | 5.15E-05 | 0.000714632 |
| Fibulin.1C..Fib.1C.                                         | 5.79E-05 | 0.000756101 |
| Stromal.cell.derived.factor.1..SDF.1.                       | 9.41E-05 | 0.00116063  |
| Clusterin..CLU.                                             | 0.000137 | 0.001522752 |
| Sex.Hormone.Binding.Globulin..SHBG.                         | 0.000143 | 0.001522752 |
| CCL21                                                       | 0.000147 | 0.001522752 |
| Matrix.Metalloproteinase.3..MMP.3.                          | 0.000151 | 0.001522752 |
| Complement.Factor.H..CFH.                                   | 0.000182 | 0.001755165 |
| Folate.receptor.gamma..FOLR3.                               | 0.000218 | 0.002013258 |
| Neutrophil.Gelatinase.Associated.Lipocalin..NGAL.           | 0.000244 | 0.002170751 |
| Carcinoembryonic.Antigen..CEA.                              | 0.000293 | 0.002437318 |
| Thymus.and.activation.regulated.chemokine..TARC.            | 0.000296 | 0.002437318 |
| Epithelial.cell.adhesion.molecule..EpCam.                   | 0.000346 | 0.002739892 |
| Epidermal.Growth.Factor..EGF.                               | 0.000369 | 0.002826217 |
| Insulin.like.Growth.Factor.Binding.Protein.2..IGFBP.2.      | 0.000498 | 0.003682711 |
| Complement.Factor.H...Related.Protein.1..CFHR1.             | 0.000515 | 0.003685042 |
| Growth.differentiation.factor.15..GDF.15.                   | 0.000539 | 0.003741652 |
| von.Willebrand.Factor..vWF.                                 | 0.000681 | 0.004582576 |
| Adiponectin                                                 | 0.000736 | 0.004717755 |

|                                                                              |          |             |
|------------------------------------------------------------------------------|----------|-------------|
| ST2                                                                          | 0.000744 | 0.004717755 |
| Complement.C3..C3.                                                           | 0.000772 | 0.004759747 |
| C.Reactive.Protein..CRP.                                                     | 0.000890 | 0.005269279 |
| EN.RAGE                                                                      | 0.000902 | 0.005269279 |
| Tissue.type.Plasminogen.activator..tPA.                                      | 0.000966 | 0.005498643 |
| Pancreatic.secretory.trypsin.inhibitor..TATI.                                | 0.001083 | 0.006011956 |
| Vascular.endothelial.growth.factor.receptor.3..VEGFR.3.                      | 0.001180 | 0.006337519 |
| Tumor.necrosis.factor.ligand.superfamily.member.12..Tweak.                   | 0.001222 | 0.006337519 |
| Leptin                                                                       | 0.001228 | 0.006337519 |
| C.C.motif.chemokine.15..CCL15.                                               | 0.001302 | 0.006566766 |
| Brain.Derived.Neurotrophic.Factor..BDNF.                                     | 0.001587 | 0.007752375 |
| CD5.Antigen.like..CD5L.                                                      | 0.001606 | 0.007752375 |
| Interleukin.18..IL.18.                                                       | 0.002068 | 0.00976851  |
| Epithelial.Derived.Neutrophil.Activating.Protein.78..ENA.78.                 | 0.002150 | 0.009944649 |
| Ferritin..FRTN.                                                              | 0.002415 | 0.010942207 |
| Lactoferrin..LTF.                                                            | 0.004077 | 0.01810089  |
| Prostasin                                                                    | 0.004334 | 0.01886553  |
| Vascular.Endothelial.Growth.Factor.Receptor.2..VEGFR.2.                      | 0.005201 | 0.021734634 |
| Lectin.Like.Oxidized.LDL.Receptor.1..LOX.1.                                  | 0.005334 | 0.021734634 |
| Vitamin.D.Binding.Protein..VDBP.                                             | 0.005366 | 0.021734634 |
| Myeloid.Progenitor.Inhibitory.Factor.1..MPlF.1.                              | 0.005420 | 0.021734634 |
| Visceral.adipose.tissue...derived.serpin.A12..Vaspin.                        | 0.005483 | 0.021734634 |
| Beta.2.Microglobulin..B2M.                                                   | 0.007797 | 0.030368757 |
| Urokinase.type.plasminogen.activator.receptor..uPAR.                         | 0.008102 | 0.031010144 |
| Macrophage.Derived.Chemokine..MDC.                                           | 0.008539 | 0.032129666 |
| Latency.Associated.Peptide.of.Transforming.Growth.Factor.beta.1..LAP.TGF.b1. | 0.008766 | 0.032185008 |
| Leptin.Receptor..Leptin.R.                                                   | 0.008844 | 0.032185008 |
| Angiopoietin.2..ANG.2.                                                       | 0.010437 | 0.037371988 |
| Angiopoietin.1..ANG.1.                                                       | 0.011363 | 0.040040439 |
| Erythropoietin..EPO.                                                         | 0.011779 | 0.040858688 |
| Interleukin.23..IL.23.                                                       | 0.012023 | 0.041062136 |
| Monocyte.Chemotactic.Protein.4..MCP.4.                                       | 0.012920 | 0.043459164 |
| Hepatocyte.Growth.Factor.receptor..HGF.receptor.                             | 0.013344 | 0.044213997 |
| Alpha.1.Antitrypsin..AAT.                                                    | 0.014721 | 0.048060835 |

**e-Table 6:** Analytes that remained stable after the treatment period- Visits 5 to 7-

| Analyte                                                 | p value     | q value     |
|---------------------------------------------------------|-------------|-------------|
| EN-RAGE                                                 | 0.031495427 | 0.051367539 |
| Stromal cell derived factor 1 (SDF1)                    | 0.032104712 | 0.051367539 |
| CCL21                                                   | 0.044538921 | 0.067868832 |
| CC motif chemokine 15 (CCL15)                           | 0.049521353 | 0.072031059 |
| CD5 Antigen like (CD5L)                                 | 0.053357451 | 0.074236454 |
| Eotaxin.2                                               | 0.061605605 | 0.082140806 |
| Hepatocyte Growth Factor Receptor (HGFR)                | 0.113655563 | 0.145479121 |
| Visceral adipose tissue derived serpin A12 (Vaspin)     | 0.119173961 | 0.146675644 |
| Carcinoembryonic Antigen (CEA)                          | 0.296735732 | 0.351686793 |
| Pancreatic secretory trypsin inhibitor (TATI)           | 0.312686245 | 0.357355709 |
| Vascular endothelial growth factor receptor-3 (VEGFR-3) | 0.475284429 | 0.524451783 |
| Growth differentiation factor 15 (GDF 15)               | 0.53569849  | 0.571411723 |
| Platelet endothelial cell adhesion molecule (PECAM 1)   | 0.613357896 | 0.633143635 |
| Thymus and activation regulated chemokine (TARC)        | 0.839664604 | 0.839664604 |

**e-Table 7:** Analytes that were differentially regulated by low and high dose hydroxychloroquine.

| Analyte                                                  | Additional weekly log Analyte change in HD |          |
|----------------------------------------------------------|--------------------------------------------|----------|
|                                                          | Mean ± SEM                                 | p value  |
| Monokine.Induced.by.Gamma.Interferon..MIG.               | -0.01774±0.006                             | 0.002925 |
| Protein.S100.A6..S100.A6.                                | -0.02102±0.007                             | 0.004137 |
| Angiopoietin.related.protein.4..ANGPTL4.                 | 0.00970±0.003                              | 0.005628 |
| Transferrin.receptor.protein.1..TFR1.                    | -0.00637±0.002                             | 0.008919 |
| Interleukin.18..IL.18.                                   | -0.00914±0.004                             | 0.013817 |
| Interleukin.2.receptor.alpha..IL.2.receptor.alpha.       | 0.00494±0.002                              | 0.017641 |
| Macrophage.Colony.Stimulating.Factor.1..M.CSF.           | -0.00922±0.004                             | 0.018207 |
| Leptin                                                   | 0.00918±0.004                              | 0.018447 |
| Sclerostin                                               | 0.00590±0.002                              | 0.021584 |
| Interleukin.18.binding.protein..IL.18bp.                 | -0.00651±0.003                             | 0.021840 |
| Protein.DJ.1..DJ.1.                                      | -0.01750±0.008                             | 0.028757 |
| Macrophage.Migration.Inhibitory.Factor..MIF.             | -0.02154±0.010                             | 0.032137 |
| Vitronectin                                              | -0.00734±0.003                             | 0.032619 |
| Interferon.inducible.T.cell.alpha.chemoattractant..ITAC. | -0.01512±0.007                             | 0.035007 |
| Visfatin                                                 | -0.01361±0.006                             | 0.038130 |
| CD163                                                    | -0.00531±0.003                             | 0.042382 |
| Interferon.gamma.Induced.Protein.10..IP.10.              | -0.01262±0.006                             | 0.048156 |

### Supplementary references

1. Warnes GR, Bolker B, Bonebakker L, et al. gplots: Various R Programming Tools for Plotting Data. R package version 3.0.1. . 2016; <https://CRAN.R-project.org/package=gplots>. Accessed 3/14, 2018.
2. Team RC. R: A language and environment for statistical computing. R Foundation for Statistical Computing, Vienna, Austria. . 2016; <https://www.R-project.org/>. Accessed 3/14, 2018.
3. Kieslich PJ, Wulff DU, Henninger F, Haslbeck JMB. mousetrap: Process and Analyze Mouse-Tracking Data. R package version 3.1.0. . 2017; <https://CRAN.R-project.org/package=mousetrap>. Accessed 3/14, 2018.
4. Klipper-Aurbach Y, Wasserman M, Braunspiegel-Weintrob N, et al. Mathematical formulae for the prediction of the residual beta cell function during the first two years of disease in children and adolescents with insulin-dependent diabetes mellitus. *Med Hypotheses*. 1995;45(5):486-490.
5. Homma K, Suzuki K, Sugawara H. The Autophagy Database: an all-inclusive information resource on autophagy that provides nourishment for research. *Nucleic Acids Res*. 2011;39(Database issue):D986-990.
6. Huang da W, Sherman BT, Lempicki RA. Systematic and integrative analysis of large gene lists using DAVID bioinformatics resources. *Nat Protoc*. 2009;4(1):44-57.
7. Huang da W, Sherman BT, Lempicki RA. Bioinformatics enrichment tools: paths toward the comprehensive functional analysis of large gene lists. *Nucleic Acids Res*. 2009;37(1):1-13.
8. Szklarczyk D, Morris JH, Cook H, et al. The STRING database in 2017: quality-controlled protein-protein association networks, made broadly accessible. *Nucleic Acids Res*. 2017;45(D1):D362-D368.
